# Supplementary material for: 5NosoAE: a web server for nosocomial bacterial antibiogram investigation and epidemiology survey
Source: PubMed Central journal article supplement — Nucleic Acids Res. 2022 May 25;50(W1):W21–8. doi: 10.1093/nar/gkac423 (PMC9252726; doi:10.1093/nar/gkac423), 2022-05-25
Supplement: gkac423_supplemental_file.pdf [file gkac423_supplemental_file.pdf]

## **5NosoAE: a web server for nosocomial bacterial antibiogram investigation and epidemiology survey**

Chih-Chieh Chen<sup>1\*</sup>, Yen-Yi Liu<sup>2</sup>, Ya-Chu Yang<sup>1</sup>, Chu-Yi Hsu<sup>1</sup>

*<sup>1</sup>Institute of Medical Science and Technology, National Sun Yat-sen University, Kaohsiung, Taiwan*

*<sup>2</sup>Department of Public Health, China Medical University, Taichung, Taiwan*

---

**Table S1.** List of 91 antibiotics belonging to 24 classes.

| <b>Class number</b> | <b>Class name</b>              | <b>#</b> | <b>Antibiotic</b>             |
|---------------------|--------------------------------|----------|-------------------------------|
| 1                   | Aminoglycoside                 | 1        | Gentamicin                    |
|                     |                                | 2        | Tobramycin                    |
|                     |                                | 3        | Streptomycin                  |
|                     |                                | 4        | Amikacin                      |
|                     |                                | 5        | Isepamicin                    |
|                     |                                | 6        | Dibekacin                     |
|                     |                                | 7        | Kanamycin                     |
|                     |                                | 8        | Neomycin                      |
|                     |                                | 9        | Lividomycin                   |
|                     |                                | 10       | Paromomycin                   |
|                     |                                | 11       | Ribostamycin                  |
|                     |                                | 12       | Butiromycin                   |
|                     |                                | 13       | Butirosin                     |
|                     |                                | 14       | Hygromycin                    |
|                     |                                | 15       | Netilmicin                    |
|                     |                                | 16       | Apramycin                     |
|                     |                                | 17       | Sisomicin                     |
|                     |                                | 18       | Arbekacin                     |
|                     |                                | 19       | Kasugamycin                   |
|                     |                                | 20       | Astromicin                    |
|                     |                                | 21       | Fortimicin                    |
| 22                  | Spectinomycin                  | 22       | Spectinomycin                 |
| 3                   | Fluoroquinolone                | 23       | Fluoroquinolone               |
|                     |                                | 24       | Ciprofloxacin                 |
|                     |                                | 25       | Nalidixic acid                |
| 4                   | Beta-lactam                    | 26       | Amoxicillin                   |
|                     |                                | 27       | Amoxicillin + Clavulanic acid |
|                     |                                | 28       | Ampicillin                    |
|                     |                                | 29       | Ampicillin + Clavulanic acid  |
|                     |                                | 30       | Cefepime                      |
|                     |                                | 31       | Cefixime                      |
|                     |                                | 32       | Cefotaxime                    |
|                     |                                | 33       | Cefoxitin                     |
|                     |                                | 34       | Ceftazidime                   |
|                     |                                | 35       | Ertapenem                     |
|                     |                                | 36       | Imipenem                      |
|                     |                                | 37       | Meropenem                     |
|                     |                                | 38       | Piperacillin                  |
|                     |                                | 39       | Piperacillin + Tazobactam     |
|                     |                                | 40       | Aztreonam                     |
|                     |                                | 41       | Cefotaxime + Clavulanic acid  |
|                     |                                | 42       | Temocillin                    |
|                     |                                | 43       | Ticarcillin                   |
|                     |                                | 44       | Ceftazidime + Avibactam       |
|                     |                                | 45       | Penicillin                    |
| 46                  | Ceftriaxone                    |          |                               |
| 47                  | Ticarcillin + Clavulanic acid  |          |                               |
| 48                  | Cephalothin                    |          |                               |
| 49                  | Cephalotin                     |          |                               |
| 50                  | Piperacillin + Clavulanic acid |          |                               |
| 5                   | Folate pathway antagonist      | 51       | Sulfamethoxazole              |
|                     |                                | 52       | Trimethoprim                  |
| 53                  | Fosfomycin                     | 53       | Fosfomycin                    |
| 54                  | Vancomycin                     | 54       | Vancomycin                    |

|    |                               |    |                             |
|----|-------------------------------|----|-----------------------------|
|    |                               | 55 | Teicoplanin                 |
| 8  | Lincosamide                   | 56 | Lincomycin                  |
|    |                               | 57 | Clindamycin                 |
| 9  | Streptogramin A               | 58 | Dalfopristin                |
|    |                               | 59 | Pristinamycin IIA           |
|    |                               | 60 | Virginiamycin M             |
|    |                               | 61 | Quinupristin + Dalfopristin |
| 10 | Pleuromutilin                 | 62 | Tiamulin                    |
| 11 | Macrolide                     | 63 | Carbomycin                  |
|    |                               | 64 | Erythromycin                |
|    |                               | 65 | Azithromycin                |
|    |                               | 66 | Oleandomycin                |
|    |                               | 67 | Spiramycin                  |
|    |                               | 68 | Tylosin                     |
|    |                               | 69 | Telithromycin               |
| 12 | Tetracycline                  | 70 | Tetracycline                |
|    |                               | 71 | Doxycycline                 |
|    |                               | 72 | Minocycline                 |
|    |                               | 73 | Tigecycline                 |
| 13 | Phenicol                      | 74 | Chloramphenicol             |
|    |                               | 75 | Florfenicol                 |
| 14 | Rifamycin                     | 76 | Rifampicin                  |
| 15 | Streptogramin B               | 77 | Quinupristin                |
|    |                               | 78 | Pristinamycin IA            |
|    |                               | 79 | Virginiamycin S             |
| 16 | Oxazolidinone                 | 80 | Linezolid                   |
| 17 | Polymyxin                     | 81 | Colistin                    |
| 18 | Steroid antibacterial         | 82 | Fusidic acid                |
| 19 | Pseudomonic acid              | 83 | Mupirocin                   |
| 20 | Nitroimidazole                | 84 | Metronidazole               |
| 21 | Aldehyde                      | 85 | Formaldehyde                |
| 22 | Quaternary ammonium compounds | 86 | Benzylkonium Chloride       |
|    |                               | 87 | Ethidium Bromide            |
|    |                               | 88 | Chlorhexidine               |
|    |                               | 89 | Cetylpyridinium Chloride    |
| 23 | Peroxide                      | 90 | Hydrogen peroxide           |
| 24 | Heat                          | 91 | Temperature                 |

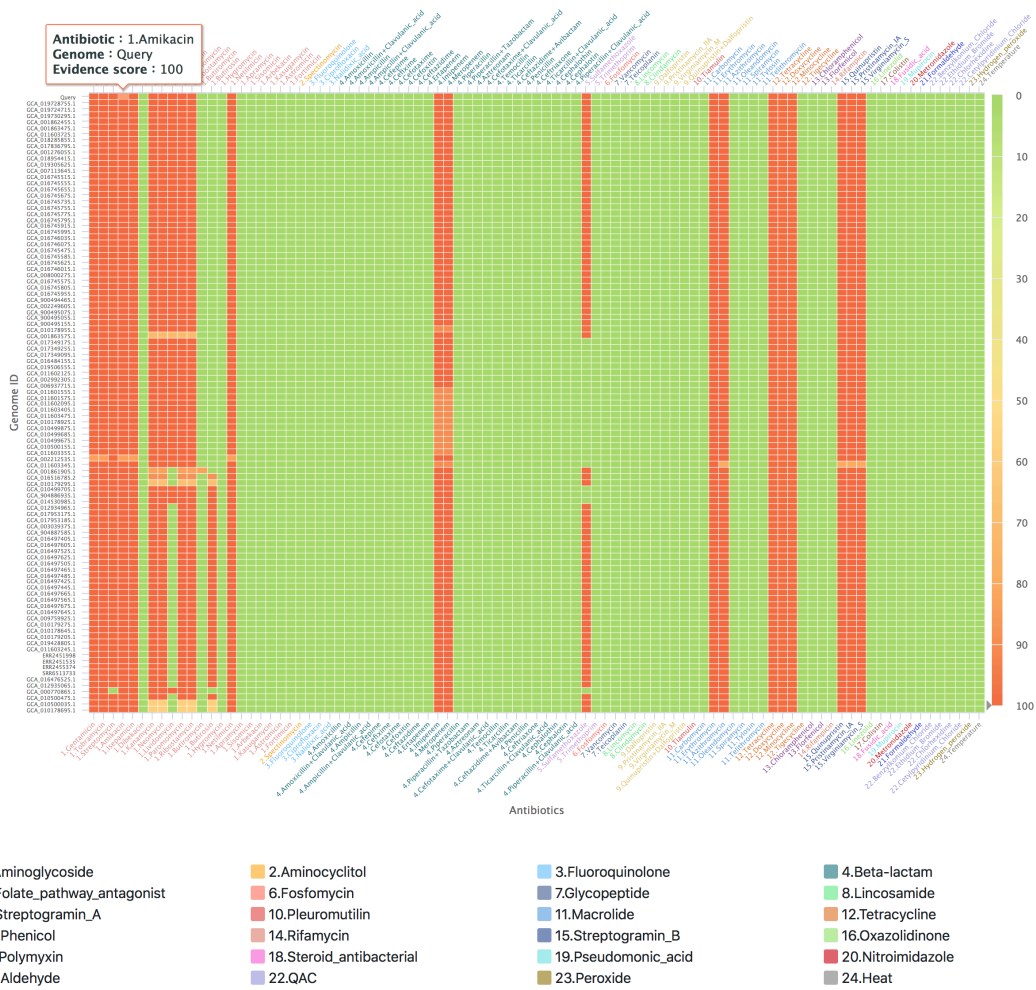

**Figure S1.** Heatmap of antimicrobial resistance profiles of the *Acinetobacter baumannii* isolate (NCBI Assembly ID: GCA\_01972875.1).
